# Supplementary material for: Functional Analysis of Promoters of Genes in Lipid Metabolism and Their Transcriptional Response to STAT3 under Leptin Signals
Source: PubMed Central journal article supplement (PMC6071087; doi:10.3390/genes9070334), 2018-07-03
Supplement: genes-09-00334-s001.pdf [file genes-09-00334-s001.pdf]

Table S1. Primers used for *ACCα*, *CPT1α1b*, *FAS* and *PPARγ* promoter cloning

| Gene           | Forward primer (5'-3')                 | Reverse primer (5'-3')              | Step            |
|----------------|----------------------------------------|-------------------------------------|-----------------|
| <i>ACCα</i>    | CCATCCGAGTGAGGTTGT<br>GG               | AAGTGCTGTCCGAGTTGA<br>GA            | PCR             |
|                | ACGATGGACTCCAGAGC<br>GGCCGCVVNVNNNCCAA | CGAGACGACTTGATGCA<br>AGCTAATA       | hiTAIL-<br>PCR1 |
|                | ACGATGGACTCCAGAG                       | GAAATGAGTCGGCAAGC<br>TATTCTGATGTGG  | hiTAIL-<br>PCR2 |
|                | ACGATGGACTCCAGAG                       | CACAACCTCACTCGGATG<br>GATGTTCGTT    | hiTAIL-<br>PCR3 |
| <i>CPT1α1b</i> | TGAACGCCAAATCGACAT<br>CCT              | GTGGAGGCCTGACAGATA<br>AAC           | PCR             |
|                | ACGATGGACTCCAGAGC<br>GGCCGCVVNVNNNCCAA | TTCGGTACTGATGCAGAT<br>TTAGGAT       | hiTAIL-<br>PCR1 |
|                | ACGATGGACTCCAGAG                       | CTAGGACGAAGAACGGT<br>TCAGTTTAAGACAC | hiTAIL-<br>PCR2 |
|                | ACGATGGACTCCAGAG                       | AAGTAATGGCTTCTCCGC<br>CCTATGTAGTG   | hiTAIL-<br>PCR3 |
| <i>FAS</i>     | AAAGCAGTAAGAAGACC<br>AAC               | GCTATGACGATTTCTCTCC<br>ATG          | PCR             |
|                | ACGATGGACTCCAGAGC<br>GGCCGCVVNVNNNCCAA | CTTAGGGTGTGAACTACT<br>GACG          | hiTAIL-<br>PCR1 |
|                | ACGATGGACTCCAGAG                       | TTCTGCGTAGTCTAGACA<br>AGC           | hiTAIL-<br>PCR2 |
|                | ACGATGGACTCCAGAG                       | CTGAGCTGCCTTGTAAGT<br>CCT           | hiTAIL-<br>PCR3 |
| <i>PPARγ</i>   | TGGGATTTGGTCTAAGCA<br>CTC              | TGTAGTTGTTCTCATGGG<br>CTCT          | PCR             |
|                | ACGATGGACTCCAGAGC<br>GGCCGCVVNVNNNCCAA | CACGAAGCTGACGTAAC<br>AAGATGCTTTC    | hiTAIL-<br>PCR1 |
|                | ACGATGGACTCCAGAG                       | GACTTCCTGTTGCTTCAC<br>CCGCTGCTT     | hiTAIL-<br>PCR2 |
|                | ACGATGGACTCCAGAG                       | CATGTGGTTGTGCTGTGA<br>GGTG          | hiTAIL-<br>PCR3 |

Table S2. Primers used for 5'-deletion plasmids construction

| Gene           | Primers           | Forward primer (5'-3')                           | Reverse primer (5'-3')                           |
|----------------|-------------------|--------------------------------------------------|--------------------------------------------------|
| <i>ACCα</i>    | pG13-402/<br>+51  | ctatcgataggtaccgagctcTCCATC<br>CTCGTGTACCGTCA    | cagtaccggaatgccaagcttCTCACT<br>CGGATGGATGTTTCG   |
|                | pG13-793/<br>+51  | ctatcgataggtaccgagctcCTGTTC<br>TTCCCAGATCTCACA   | cagtaccggaatgccaagcttCTCACT<br>CGGATGGATGTTTCG   |
|                | pG13-1154<br>/+51 | ctatcgataggtaccgagctcTCGGTA<br>TCTGAAGACTTGACTC  | cagtaccggaatgccaagcttCTCACT<br>CGGATGGATGTTTCG   |
|                | pG13-1518<br>/+51 | ctatcgataggtaccgagctcTTGCTC<br>CGTTCTGCTAAATG    | cagtaccggaatgccaagcttCTCACT<br>CGGATGGATGTTTCG   |
|                | pG13-1914<br>/+51 | ctatcgataggtaccgagctcTGGATG<br>GATGGATAAATGGAAGT | cagtaccggaatgccaagcttCTCACT<br>CGGATGGATGTTTCG   |
|                | pG13-2234<br>/+51 | ctatcgataggtaccgagctcGTGTAT<br>ACAGTAGATGTTGGCTT | cagtaccggaatgccaagcttCTCACT<br>CGGATGGATGTTTCG   |
| <i>CPT1α1b</i> | pG13-387/<br>+24  | ctatcgataggtaccgagctcTTAAAT<br>GGTTAGGTGTTAGGTGG | cagtaccggaatgccaagcttGCTTCT<br>CCGCCCTATGTAGT    |
|                | pG13-726/<br>+24  | ctatcgataggtaccgagctcCTGAAG<br>AATCAAAGGAAAGGTG  | cagtaccggaatgccaagcttGCTTCT<br>CCGCCCTATGTAGT    |
|                | pG13-1120<br>/+24 | ctatcgataggtaccgagctcGTTTCGT<br>GGGCATATTTGTTG   | cagtaccggaatgccaagcttGCTTCT<br>CCGCCCTATGTAGT    |
|                | pG13-1480<br>/+24 | ctatcgataggtaccgagctcGCACAG<br>ACCTGATTGCTGA     | cagtaccggaatgccaagcttGCTTCT<br>CCGCCCTATGTAGT    |
|                | pG13-1709<br>/+24 | ctatcgataggtaccgagctcCCCTAA<br>TTCTAACGAGCAAGCC  | cagtaccggaatgccaagcttGCTTCT<br>CCGCCCTATGTAGT    |
|                | pG13-2155<br>/+24 | ctatcgataggtaccgagctcGGGATT<br>AACTCTGTGGACTGG   | cagtaccggaatgccaagcttGCTTCT<br>CCGCCCTATGTAGT    |
| <i>FAS</i>     | pG13-326/<br>+39  | ctatcgataggtaccgagctcCCTACA<br>AGATGCAACACCTC    | cagtaccggaatgccaagcttGGTCTT<br>CTTACTGCTTTGGTT   |
|                | pG13-746/<br>+39  | ctatcgataggtaccgagctcTCTGAT<br>TCGTTTACGGTCCTC   | cagtaccggaatgccaagcttGGTCTT<br>CTTACTGCTTTGGTT   |
|                | pG13-1152<br>/+39 | ctatcgataggtaccgagctcATATAG<br>CCGTTGCACTACACAG  | cagtaccggaatgccaagcttGGTCTT<br>CTTACTGCTTTGGTT   |
|                | pG13-1380<br>/+39 | ctatcgataggtaccgagctcTGTA<br>TGACTTGTCAGCTCT     | cagtaccggaatgccaagcttGGTCTT<br>CTTACTGCTTTGGTT   |
|                | pG13-1525<br>/+39 | ctatcgataggtaccgagctcGTACAA<br>AATGTGCCATCCGAG   | cagtaccggaatgccaagcttGGTCTT<br>CTTACTGCTTTGGTT   |
|                | pG13-1960<br>/+39 | ctatcgataggtaccgagctcTGTGCC<br>AACATTTACCCCTG    | cagtaccggaatgccaagcttGGTCTT<br>CTTACTGCTTTGGTT   |
| <i>PPARγ</i>   | pG13-439/<br>+63  | ctatcgataggtaccgagctcTGGTTA<br>TGGCACAAATGCAAC   | cagtaccggaatgccaagcttTTGGTG<br>ATACTGAGCTTCGTAAT |
|                | pG13-671/<br>+63  | ctatcgataggtaccgagctcTTGGCT<br>ATAAATGCATCCTG    | cagtaccggaatgccaagcttTTGGTG<br>ATACTGAGCTTCGTAAT |
|                | pG13-784/<br>+63  | ctatcgataggtaccgagctcCATGCC<br>ATGTTCCCTGGAC     | cagtaccggaatgccaagcttTTGGTG<br>ATACTGAGCTTCGTAAT |

|                   |                                                  |                                                  |
|-------------------|--------------------------------------------------|--------------------------------------------------|
| pGl3-1241<br>/+63 | ctatcgataggtaccgagctcTTGACT<br>GGAAATCGGTTTATACT | cagtaccggaatgccaagcttTTGGTG<br>ATACTGAGCTTCGTAAT |
| pGl3-1575<br>/+63 | ctatcgataggtaccgagctcTGGTAG<br>GGAAGAGTACCTGA    | cagtaccggaatgccaagcttTTGGTG<br>ATACTGAGCTTCGTAAT |
| pGl3-2033<br>/+63 | ctatcgataggtaccgagctcTGCGGT<br>GTCCAACATACTCA    | cagtaccggaatgccaagcttTTGGTG<br>ATACTGAGCTTCGTAAT |

Table S3. The reference binding site sequences

| Name           | Binding site sequences |
|----------------|------------------------|
| CREB           | TGAGCT                 |
| HNF4 $\alpha$  | CAAAGT                 |
| MTF-1          | TNTGCACACG             |
| NF- $\kappa$ B | GGGANTTCC              |
| NF-Y           | CCAAT                  |
| PPAR $\alpha$  | GGNAAAGGT              |
| PPAR $\gamma$  | GGNAAAGG               |
| SP1            | CCCCNCCCC              |
| SREBP1         | TCACCCA                |
| STAT3          | TTCTNGGAA              |
| STAT5          | TTCCNNGAA              |
| TATA-box       | TATAAA                 |

Table S4. Primers used for site-mutation analysis

| Gene           | Primers          | Forward primer (5'-3')                               | Reverse primer (5'-3')                                     |
|----------------|------------------|------------------------------------------------------|------------------------------------------------------------|
| <i>CPT1a1b</i> | CMut-STA<br>T3-1 | CTAtcgaggtgtctTGTTTTTAAT<br>GTTTGCTGATTTTTTTA        | ACAagacacctgaTAGCTGTT<br>AAATAGCTAAATGGTGC<br>A            |
|                | CMut-STA<br>T3-2 | AAAcaggatctgctAAGAAATA<br>AAATAAATACACTGGCAA<br>CTAT | CTTagcagatcctgTTTAAATA<br>ATTATGTATGTA ACTATT<br>TACACCACT |
| <i>FAS</i>     | FMut-STA<br>T3-1 | GAAAcacattagagAGATTCCAG<br>TACGATAACTTTACATGC        | TCTctctaatgtgTTCATATTT<br>TTTAAATATGATGTTGAT<br>TAAAG      |
|                | FMut-STA<br>T3-2 | AGCcaccatacgaGCAGTCAA<br>GATTCGAAATTACAACA           | TGCttcgtatggtgGCTTTGCCT<br>TTTTACCAGGTTT                   |
|                | FMut-STA<br>T3-3 | ACAAtgcagctagctCCAAATTCC<br>TTTTATGTGTCGACA          | TGGagctagctgcaTGTGACCC<br>TTAAAAGTACAGACATG<br>G           |

Table S5. Primers used for electrophoretic mobility-shift assay

| Primers                      |                     | Forward primer (5'-3')         | Reverse primer (5'-3')         |
|------------------------------|---------------------|--------------------------------|--------------------------------|
| CPT1 $\alpha$ 1b<br>-STAT3-1 | Biotin-probe        | Biotin-CTAATTCACGTAAATG<br>TTT | Biotin-AAACATTTACGTGAA<br>TTAG |
|                              | Mutative-competitor | CTATCGAGGTGTCTTGTTT            | AAACAAGACACCTCGATAG            |
| FAS<br>-STAT3-3              | Biotin-probe        | Biotin-CACAAACACCTGGAA<br>CCAA | Biotin-TTGGTTCCAGGTGTTT<br>GTG |
|                              | Mutative-competitor | CACAAGCAAGTCTATCGTA            | TACGATAGACTTGCTTGTG            |

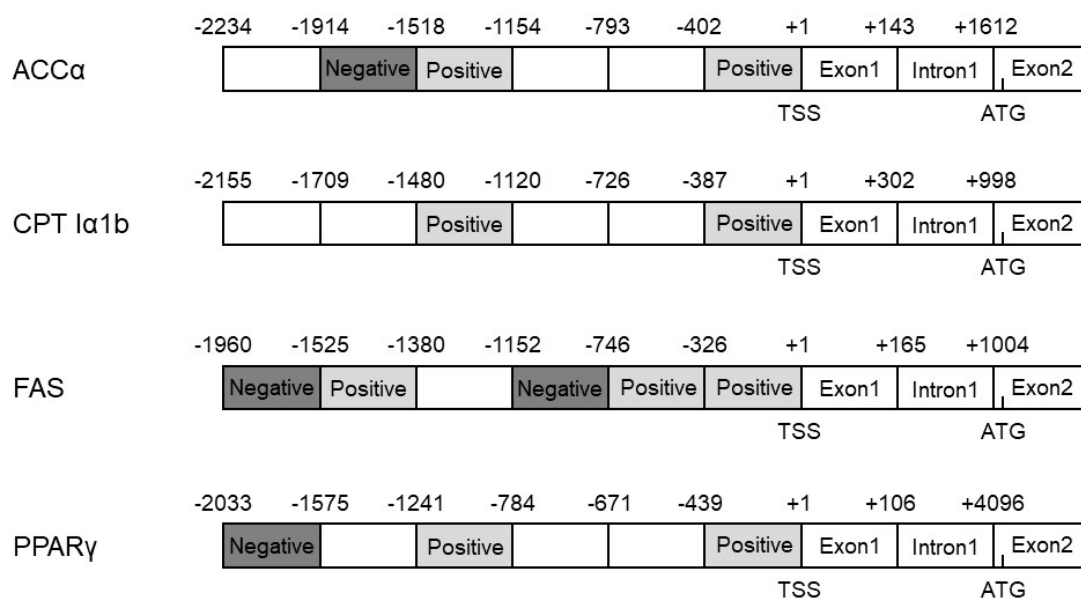

Figure S1 The schematic diagram of *ACC $\alpha$* , *CPT1 $\alpha$ 1b*, *FAS* and *PPAR $\gamma$*  gene structure. Positive: the region that positively regulated the promoter activity. Negative: the region that negatively regulated the promoter activity. TSS: transcription start site. ATG: translation initiation site.

CACAGCTCCA GCTCTGTGTA TACAGTAGAT GTTGGCTTTA AGCCCAACAC TTTTTCCTCC CTTTACTTAT CAGACAGTTT TCTGATAAAA AAAAAAATAA -2150  
 AGAAATTGGA GAGCACAGTT ATCACAAAGAA ACTATTACTA AACTGTGTGC TCTGAAATG TACAACAAA CATTCTGAAA TTCAGAGGAC ATTTAGTTTG -2050  
 TTGGACTTTC AGATTTCAGA AGTCAAATG AGAAGTAGCT CTTTATTCTT TTTTTCCTCC TTTTTCCTCC GATTCCATAA CTTCTTATAT TCAGTAACTG -1950

**HNf4a**  
 TAAACAATT GCTGCACAAA AAATGGATGG ATGGATGGAT GGATGGATAA ATGGAAGTAA TAAGAAACAT GGTGAAATAA TTACAGATTT TTCCCATTTA -1850  
 TTGTATGGT ATTTTATATAT GACACAAAAA CATATATGAA TCATTTACAT TACAGCTGAT ATAAACACTC GTTATAGCAA ACACCTGTGT ACTTCGTTTA -1750

**STAT3**  
 TCAATTTTAC ATGAAAAGCA CTGACACTGT AGACTTCTTC CATAAATGTA AGACATTAGT CTTAGATTGC ATTTGGTCTT CAGTATACAT GTCCTTGTTA -1650  
 ACATCATACA CATCTTTAGT TGGTACTTAA CAATAACGTA TTAAGAGCAA ATCTGATCAA TCTGATAAGT GCTGCAATCA TTTTTCCTCC ACCCAGAATT -1550  
 GGTCATAGCA TAGTATTTAA CTGACTTAT TTGCTCCGT TCTGCTAAAT GTTCACATAT AAATGATTTA TGATGAATGT TTTTATGATG ATGTGTGACTG -1450  
 TTTTAAAGTC AGATTTCTTT TTGCTGCTG AGAACATTTG AGGTGAATCA AGCTTTTGT TATTTTCTCC TTCCATGAAT CCCTTCTAAG GTCTCATGTT -1350

CCACTGCCTG TTTTATCTGG CAGTAGGACA GGTGATGTCT GCATGATCAT TAAACTTTGA GCTGAACCTG AACCTAAAAA TCACGCTTGC ACAAGACTGA -1250

**PPAR/RXR**  
 TATTTTATCG TTCTGAATCA ACCCGTTTAC ACAATAGTTA GATTGGATGC CAATGCCTCT GTGCTACGTC TGAGTGAATC CGGGTCGAAG GTGCTTCGGT -1150  
 ATCTGAAGAC TTGACTCTAT CTACAGTTAG CTGAAGTATT GAACATTAT TTAAGAGACA TTTCATCCAA AGTGCCTTCC GGTGAGCCT TCAGATGAC -1050  
 GGTTAAAATC TACTGGGATT CGACCTCACA ACCTTCTGCT CGGTATTTCA TATTCAGTAT GATACTGACA CCGAAATGTT CCTTGATACC TAAGTAGATC -950  
 TTCTAGGTTG ATGGGATGTG ACTGTATCGG TGCAATCAGTA CAACAGCACA CACATTAGCA TCATTATAAT GACTGCTGTG GAATGAAATA AAAATGTTCA -850  
 GTAAATAGAT TAGTATTTAA GGCAATTTAC GTCAATCTCT TAAGAAATGAT AAATATCTGT TCTTCCAGTA TCTACAGAG ATTTCCATAC ATGTGTGACTG -750  
 TTTTGGAAAG GACAACCTTG GACATGTTTA ATACTTGGAG ACTGTTTGT TTTTGGACA ACTGAACCAC ATTATTTATCC CAAATCGCTC GTCTTGTAT -650

**HNf4a**  
 TGCAATGATA AGACATGCAA ACTTTTGA CTTATGTTAT TTGCATTACA TGTGATAATG TTATTTATTT TAGATCCCTA AAGCTATCTG AACCTTGTGA -550  
 CTCAATTATA TCTATAAAAA AAATAAGAAAT AAATCATTAA ATCATTTATG CGAGTCTTTT TCCCTTCTGC TTATTTATTC TTTTCTGTTT TATTGCATTT -450  
 CTTATTGCAA ATTTTATTTT TTGTATATATA AATAAAATGG AAAAAATCCC ATCTCTCTGT ACCGTACCTT TTAATTCATA AACGATTTT AGTCGGATCA -350

**PPARy**  
 GCGGATACCG CGCACAAAAA CGCGGACCAC CAGACCTCT CTCTCATGG TTACACCTCT CTTTATTTGC ATATCAAAAC CGGCCCTAA CTGAACACAG -250

**SREBP1**  
 AAATTCCTATT CGCTCATTCG TTCGGCGTGA GACTCTTAAA GTTCATAGTT CGACAATCTG CAGTAACTTC ACTCGACTCC CCGTTTTTAC ATCCCACCTG -150  
 CATTCCGACA TAACGCTTCC TTGTTTTGTG ATTGACTCAT ACAGCTGTCC AATCAGAGAC CAGAACTCGG GTGTACAATT TACATATGAC CAATCAGAGC -50

**NF-Y** **NF-Y**  
 AAAACAGACC GGCAAATTCC AATACGGGTA GGATAAAAAA ACGCTTCCGG TGAGTAGCTA AGCTTATTTA CTCGAAAGCT AACGCTAGCT GAATATTAGC +51

**TATA-box** **TSS**

Figure S2 Nucleotide sequence of yellow catfish *ACCα* promoter. Numbers are relative to the transcription start site (+1). The putative transcription factor binding sites are underlined. The highlighted sequences show putative transcription factor binding sites of STAT3.

CCTAACACTT TCTTTCCACT GACGCTCTTC CGGGGTTTAT TTTTGGCGAG AGGACTGCAA CAAATCTATG GACTGGAGTA GGGATTAAC CTGTGGACTG -2132  
 GAGTTGGGAT TAAATATGTG GACTGGAGAA ATTACTAAAT CTCTGGACTG GAGTACTGAC TAAATGTGTG GACTGGAGTA AAAAACTAAT TCATTCATTC -2032  
 ATTCGTTTAT TCATTCATTC ATTTTCTACC GCTTTTTCAA TTCAATTTCA TTTATTTGTA TATTTACTTT TAAAAATTC CATTGTCTCA AAGCAGCTAT -1932  
 ACAGAAGTAT GGAACAGAA GAGAGAGATA TAAATAAATC AAACAATAAA ACAACAAAC AAACAACAA ATAAAGAAAG AAAGAAAGAA AGAAAGAAAG -1832  
 AAGAAGAAGA AGAAGAAGA GAAGAAGAAG AAGAACGGAT AAAAAATAAT AAATGAATAT ATACAATTTA AGTTTAAAAA AAGATTTAACT -1732  
 TAAAATTTAA AATACTATAT ATCTATCCCT AATCTAACC AGCAAGCCGA AGGTGACTGC GGCAAGGAAA AACTCCCTGA GAAGATATGA GGAATAAAC -1632  
 TTGAGAGGAA CCAGACTCAG AAGGGAACCC ATCCCTCATTT GGGTGACACT GAACAGGACA TAAATGTAAT GTAAAAAAA AAGTCCCTTT CTACACAGT -1532  
 TGATGCAACT GAGAGCTTCT GAAAAACTAA TGGGTCATCG TAAACTCTGA GTTCAGCACA GACCTGATTG CTGATCAAGA CCAGACCATA CAGTTGACTG -1432  
 ACACAACATT GATTCAAAAG AAGGCATGAT AATCTCTGGG CGGCTCCATC CACAACAATC CCATGAGACA CTTGCTGAAA ACAAGATTGT AGTAAAAAAC -1332  
 AAATTACTGC TGAAGTATTA AATACACCTA TGGATCAAG TATTACTAAA TAAGTATATA TCTACACTCA CTGTCCACTT TATTAGAAAC ATTCATGCTT -1232  
 TTATTGAATC AGAGAATAA CAGCAGCTCG ATTACTATGC ACCATAGTGA ACATTAATTT TAAATTTAA AATTGAATAT TAGGAATAGT GGACAGCAAT -1132  
 GGATTCCTTA CTATGGTTCC TGGGCATATT TGTGCTTCA GCTCATTAAT CTGTCTTTTA TCGCAGTCGT TTTGTTTTGT TTTGTTTTGT TTAGTCCACA -1032

**MTF-1** **STAT3**  
 GGTTAAATCC TTGCACCAAT TAGCTATTTA ACAGCTAATT CACGTAATA TTTTAAATGT TTGCTGATTT TTTTAAACGT TAGAATAGTT CTGCACTAAA -932  
 TGTTTGTAT TTTAAGACAA AATATAATTT TGTACCCAT ACAAAATTT TTAATTTTAA GTCTTTAGTA TTAATAAAT GAATAGTGGT GTAATAGTT -832

**STAT3**  
 ACATACATAA TTATTTAAAC ATGTTGGAAAT AAGAAATAAA ATAAATACAC TGCCAACACT GTAAGCGTTA TTTTAAATGTT TTTATTACAT ACTTACTTTT -732  
 CTTTCTATTC TGAAGATCA AAGGAAGGT GTATGAGACA GTAGTGAGAC CAGCTCTGCT GTATGGGTTA GAGACTGTAG CTGTGAGGAT CAGACATGAG -632  
 GCAGAGATGG CCGTAGCAGA TATGAGGATG TTGAGGTTCT CTTTAGGAGT GACAAGGATG GACAGGATTA GGAACGAGTG CATCAGAGGG ACGGCTCAGG -532

**MTF-1**  
 TTGGCTGTTT TGTGGACAAG GTCAAGAGG ATAGATTTAG ATGGTTTGGG CATGTACAAA TGAGGGAGAT TGTATATTTG GTAGAAATGAT GTTGGAAATG -432  
 GAGGTGAGGT CAAGAGGAAG GACAAAGAGA AGATATATGG GCATGAAGTT AAATGGTTAG GTGTTAGGTG GAAACAGATT ATTTGCTGTG GCATTTTGGC -332

**HNf4a** **PPARα/RXR**  
 TTTCTTTTAA TTCTCTTAT ACAAACTTGT CCTCTCTTTC ATCTGAGGGA TTCGATATTA TAAAAATAGC CACATGATTT ACATTGACAG GATTTTTTGT -232

**SP1**  
 GTGAAACTTT GTGTGCTGCC ATTTTGGCCA GGACTCCCTG GTAGAAGAGA TTTTTTTTAA TCTCAATGGG ATTATTCTCG GTAAAAATAA AGATAAATAA -132

**SP1**  
 ATAAAAATAA ATAAATTTAT GCCTAAATTA ACAGCAGAAAT AAATAAATAA ATCTCTCCG CACCCTAGG GGGCGGTGTG CACATTAAGT AAGTCTGAGG -32

**SP1**  
 TTGAATCCCA AAAATCTGTA ATGTAAACAA AGTGCACTAC ATAGGGCGGA GAAGCCATTA CTTTCTTTTA CTTATAGTGT GCCTATGTGC GGCCTGTGTA +69

**TSS**

Figure S3 Nucleotide sequence of yellow catfish *CPT 1a1b* promoter. Numbers are relative to the transcription start site (+1). The putative transcription factor binding sites are underlined. The highlighted sequences show putative transcription factor binding sites of STAT3.

CAGTCCCTGC AATAAGCCAG GAGCTCAGTC AAATCTGCAT CTAGGCAGCT GTGTACACAA AATGTGCCAA CATTTCACCC TGTTACTTT TAGGTTTCAT -1913

AGATCTAAGT GGTTCAAATC AAGCACAGTT CTCAGTACCC TTCTGAACTT TTAATCAACA TCATATTTAA AAAATATGAA AATCCTAAAA GAGATTCCAG -1813

TACGATAACT TTACATGCAG GGTACACAG CACACCATT TGTGACCTTA TGTGTTGATG CCCCCTGCATG GGCTTCCCTCT GAATAATTTA CAGATACTGT -1713

TCCTGTGTCA GCCAGAGCAG AGGAAAATAG AAATACACCA CATCCCGGAT TACCAGTTCA AGTTCCAGGGC TTGAAAGCAG TGATCCAGGA GAGAAACAAA -1613

AAAGCCAGAA CTACATCTGA ACCTGGTAAA AAGGCAAAGC CAGCTGGAAA GGCAGTCAAG ATTCGAAATT ACAACATTAA AGACTGAAAC TATGCAGGTA -1513

CAAAAATGTGC CATCCGAGCA AGATTTTGAA ACTATTTAAC AAACCCGGAT GTTGTGTTTT ATGAATCGTG AGTTCAAATA TGTGAAATAT TTGTTACCTT -1413

TACTGAACTC TAAACTCTGT GGGTTCCTTG TAAAATGTAC CTTGTAAATG ACTTGTCAAG TCTGTCAATG AAAATAAAAA ATGTTTTTGT AATAATAAAA -1313

**PPAR $\alpha$ /RXR**

TATTTTTATA CTCAATAACT CAATACTGTG GTTGTATTTT ACCTGCAAG TATACACCTA CTTATGCCTA TAGTTTCTTA CACTTAGCAG TAAGGAAGTA -1213

TGTCGTGTGT CATCACCTGT CTAACCTGTC TCAAGTCAAG TCAAGGAGCT TTTATTGTCA TTCAACCAT ATATAGCCGT TGCACTACAC AGTGAAATGA -1113

GACGTTTCTC CAGGACCATG GTGCTACACA AAACAAGATG GCAATGGAGT GTTTTGAACA TAGTCGTGTA TGTAGCACAC TTTGGTTTCT CACTAGCTGC -1013

TTTATTATAC ACTCTATTTT AATCTACAAT CTGTGTTGCT TTCTGACCAC AGCAGGATG TTGGTTGCAT ATTTTGTGTT CAAAATGATC ACGAGATGTT -913

CAACCGCTTC TCAGACGAGC TGTGGGCTT GATACAGATG TTCCAGCACC ACACATACAC ACAAACTCAA AGATGCCATG AGGTGGTCC ATGTCTGTAC -813

TTTTAAGGGT CACAAAACCC TGGAACAAA TTCCTTTTAT GTGTCGACAA ACTTGGCCAA TCAACCTGAT TCTGATTCTG ATTCGTTTAC GGTCTCCAT -713

CCATGGACGC TGTGTGGTTA AACCGAGCAC TGAACTGTAA AGACTCTTGC GCTTTAACTA TAAACAGTAT AAAACATCTA TAGAGTGAAC CGAAATAACC -613

CCGTTAAACG ACACGCCCTC TTGATGACCT CACAGGCTAC GCTTGTCTTT AGCAGGACGC CTTAATCGGT TCCTCATCAC CTCACCCCTAT ATCAGAAACA -513

CGCCCTTTCT TCGTCTGAT TGGCCAAAAG TCAACGTCAA TCACGAAACT GTGTGATCTG CAAGCTGTG CACGTGAAAC ATCCCAAAAT CACTGAAATA -413

**PPAR $\gamma$**

AATGGCTTC ACAGCAGTAT TGTAAACTCA GTTTAACATT AATATATTTG TCCCTAGCTG ATTTAAAGCT TTTTGAAAT AGCACTCGTA CATTTTCTTA -313

CAAGATGCAA CACCTCATTT TAAGACACAC ACACACACAA TGACGCTAT ATCTAATCTT GACCCAGATT CATTAGGCAA TAAGGCAATG TACTTGTCTA -213

GGTTACTGTG ATAGCATGCA TCTGTGCATG ATGTTGCACA TAAACCTTCC ATTTATGATC TGAACCTGAA TAACCTGTGT TTTTAGCGGG AATTAACGTT -113

AGGACATCAG CTCAGTGGTT GGAATGTTGA TCCCTGCCCTC CTTCTCATT GACTAGAAA CCCAAGGCAA CTGTCAGCCC ATGTGGCGTG GCTATACAC -13

**NF-Y** **NF-Y**

ATGGCACACA TTTAAATGAA ACAGACATCA GTGCAAAAGC AACCARAAGCA GTAAGAAGAC CAACACTCAG AAAAAAGGGG TTATTAATCC ACATTCACAG +78

**TATA-box** **TSS**

Figure S4 Nucleotide sequence of yellow catfish *FAS* promoter. Numbers are relative to the transcription start site (+1). The putative transcription factor binding sites are underlined. The highlighted sequences show putative transcription factor binding sites of STAT3.

GAGGAAGCTG AGGAAGCGCG GGAACCTCA GGAGAGACAT CAACTGTTAA CTCATGCCTA TTAAGGCAA TTGGAGGAAA GTTCATGTCC TCCGATATTG -2072

TGCAAGAGCA AATTTCCAG GGGCTACACA ATAAAGATTG CGGTGTCCAA CATACTCATC AGAAAGGGTG TTTGCAGCAA ATCTGATTTG TCATCAAGGG -1972

CTGGAGAGA ATGTTACAGT AACCGATTGC TTAACATCCG TCCTCATGTA CTTGTGCATG TTTTAAATGTT TTCTCCAGGG ATTTGGATTG AAAAGCATGA -1872

**CREB**

GATCATAATT AGTCATGTGC TAGAACGTTA GAGGAGTTGC AATGTGCTTG CATAAATGTG TGTGTGTGCG TGTGTGTGTG TGCATGCGTG TGTGTGTGTG -1772

TGTGCATGCG TGTGTGTGTG TGTGAGACGT TGCTTTGTGG TCTACAGCAG CAGTAAACT AGCTCAGGAT CATTGCTTG AATTGCAT TGTAAATGTC -1672

GAGTCAGCTG TTGPGAAAG TTTGTACTTT TGTGGAAAGT TTGTACTTTT CTGTTTTTTC TTTCCACTTT TCTAATGTTA ATGACAGCTT TTCTATTGGT -1572

AGGGAAGAGT ACCTGAATTT TATTAACTTA ATTTACACTA AAAACACAAA CTGAAAAAAA AAAATTACTT CACAAAAAAG GATTAATAAT ATTTGGCAATA -1472

GGTGCATCCC AAAATTCAGT TTGCAATATT CTCTGCCATT TTGTAGTAAA AATGTAGACA AGTTAACAGT GGAAATTTCTA ACAAGTGGAA GTGCACTCGA -1372

**NF-kB**

AGCACGCCGA TGACGCCTT ATTCAACCTA ATAAACAGCG AGTGGAAATG CACTTCAACC GTTGTAGCTT TCTTACACAA AAGGAAAGGG GCATTGAAAA -1272

AGTATAATTT TTTATGATGG CCACCGAACA TTGACTGGAA ATCGGTTTAT ACTTCCAGTG TAGTTTCACA TTTGAGACGA TACTCCCTTA AAATTCGTAC -1172

ACTAAACAGT AAAGTGCTTA GTGCAAGTGC TTAGTCATTT GGGACACAGC TGACGAGACT GGATTTTACC AAATTTTACC ACATATATAT TCGTGTAAACA -1072

AGCCCTCTTA TTTTGGCAA CACCCACTGG ACAAAATTATG CTAAGTTACC CAACATGGTG GAATGATCTA GAACAGGATA ACAGCAGATT TAGTGTTCCT -972

GGAAATTGAG CTTGTACCTA TTTAATTAAT TTAGATAAGT GGTTTACATG ACATATTATC CATATTCTCT AAAAGTCATG CAATCTTTTG TTTTFTTTT -872

TGTTTCTCAG TCTGGGTGAA GTTGGGTGCA CCAGACTGCA GACTACTGCA GGCTGTTAT TACAARAATG TGTCTGTGTG AAAGACACAT GCCATGTTC -772

CTGGACAAA CCTAGTTTTA GCACAAAACC GTTTAGCAGA AAATGGTTCA TTTTAAATGG AGAAGGCTTT GTTATCTATT ATTATCTAGA AGCAGTGTATG -672

TTGGCTATAA ATGCATCTTG CTTGAATAGA TTCTTTTTTT TTTAATCAGC GTATTTGTGG TATTTTGGTG TGTAACCTAA TATAATACTG TGTGTGTCCA -572

ATAACATGAT CTTTATTGCC AGTATTTGCA AATGCTTAGT GTGGCACGTG TGAATATAT GGAATCATT TTCCAGTAGG AATGAAATGT GTCGTGTTAC -472

**HNFI4a**

TTGGTAAAAG TGCTTTTCGA ATCGTTTAAA CATGTTTATG GCACAAATGC AACATATTTCT ACTATAAGAT TTTTGAATA ACAACACAGC AACCATAACA -372

AACACACACA CACACAAA CAACACACACA CACATACTGT ACACAAAAA TCTGATAGTA AAGCTACTAT CGGTCAACAT GACTGTCTATG ATCATAGGAT -272

CTGAGGTCAG GGCCTCTCAG TAGTGACACT GAAAATGTCA CGGTGTAGAG AAAGCATCTT GTTACGTCAG CTTCGTGTTA TAAATTTATC CAGGGGAAGA -172

AGTGATCCAT CCACCTTTCT GTAAGAGAAA GTGGAAGACA GAAAAGCAGC GGGTGAAGCA ACAGGAAGTC ATCTGGCTAG CCGATCACCT CACAGACAAA -72

**NF-Y**

CCACATGATG GTTAGCTGTC TGCACCTTTG CTGAGGCCAT GCAGTGTA AAATCAAGTTC CTGTTCAATT TGTGTAGAAC ACTTGACCAG TTACCAAAGT +29

**TATA-box** **TSS**

Figure S5 Nucleotide sequence of yellow catfish *PPAR $\gamma$*  promoter. Numbers are relative to the transcription start site (+1). The putative transcription factor binding sites are underlined. The highlighted sequences show putative transcription factor binding sites of STAT3.
